# Supplementary material for: Fragaria viridis Fruit Metabolites: Variation of LC-MS Profile and Antioxidant Potential during Ripening and Storage
Source: PubMed Central journal article supplement (PMC7559413; doi:10.3390/ph13090262), 2020-09-22
Supplement: pharmaceuticals-13-00262-s001.pdf [file pharmaceuticals-13-00262-s001.pdf]

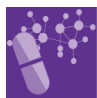

1 *Supplementary materials*

2 ***Fragaria viridis* Fruit Metabolites: Variation of**  
3 **LC-MS Profile and Antioxidant Potential during**  
4 **Ripening and Storage**

5 **Daniil N. Olennikov <sup>1,\*</sup>, Aina G. Vasilieva<sup>2</sup>, and Nadezhda K. Chirikova <sup>2</sup>**

6 <sup>1</sup> Laboratory of Medical and Biological Research, Institute of General and Experimental Biology, Siberian  
7 Division, Russian Academy of Science, 6 Sakh'yarovoy Street, Ulan-Ude 670047, Russia

8 <sup>2</sup> Department of Biology, Institute of Natural Sciences, North-Eastern Federal University, 58 Belinsky Street,  
9 Yakutsk 677027, Russia; hofnung@mail.ru (N.K.C.)

10 \* Correspondence: olennikovdn@mail.ru; Tel.: +7-9021-600-627 (D.N.O.)

11 **Content**

12 **Figure S1.** High-Performance Liquid Chromatography with Diode Array Detection chromatogram of free  
13 sugars in *F. viridis* ripe fruits.

14 **Figure S2.** High-Performance Liquid Chromatography with Electrospray Ionization Triple Quadrupole Mass  
15 Spectrometric Detection chromatogram of *F. viridis* ripe fruits extract coupled with spectrophotometric DPPH  
16 radical scavenging assay.

17 **Table S1.** Reference standards used for the qualitative and quantitative analysis by HPLC-DAD-ESI-tQ-MS  
18 assays.

19 **Table S2.** Regression equations, correlation coefficients, standard deviation, limits of detection, limits of  
20 quantification, and linear ranges for 48 reference standards.

21

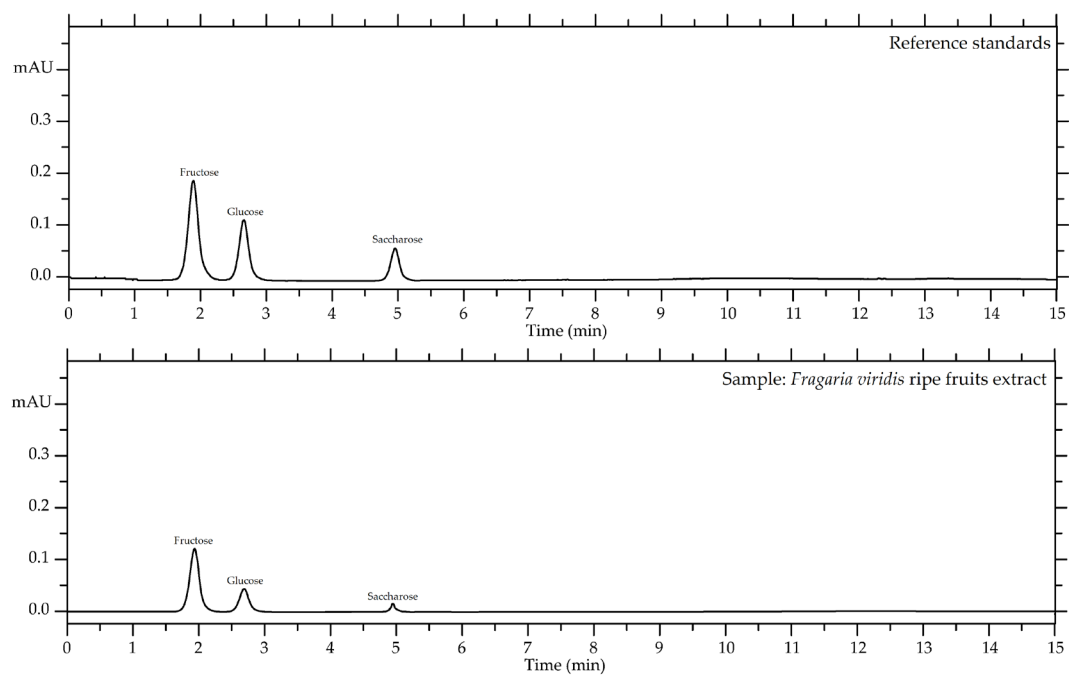

22

23

24

**Figure S1.** High-Performance Liquid Chromatography with Diode Array Detection (HPLC-DAD) chromatogram (detector wavelength 190 nm) of free sugars in *F. viridis* ripe fruits.

25

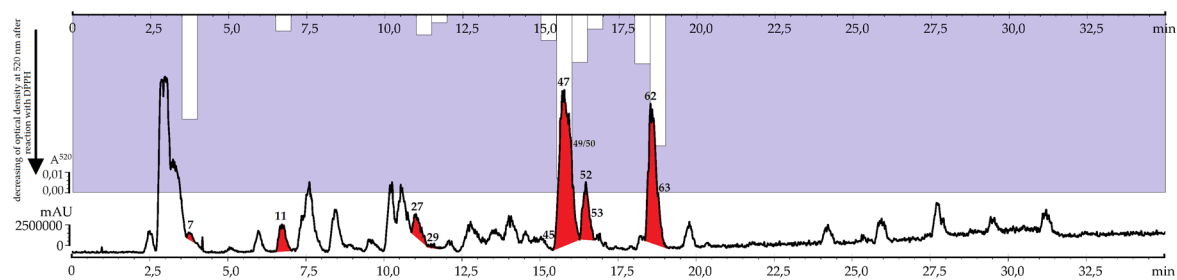

26

27

28

29

30

**Figure S2.** High-Performance Liquid Chromatography with Electrospray Ionization Triple Quadrupole Mass Spectrometric Detection (HPLC-ESI-tQ-MS) chromatogram (Total Ion Chromatogram or TIC mode, negative ionization) of *F. viridis* ripe fruits extract coupled with spectrophotometric DPPH radical scavenging assay.

31 **Table S1.** Reference standards used for the qualitative and quantitative analysis by  
 32 HPLC-DAD-ESI-tQ-MS assays.

| No <sup>a</sup> | Compound                                               | Standard <sup>a</sup>                                            | Purity, (≥)<br>% | Manufacturer<br>(Cat. no) <sup>b</sup> |
|-----------------|--------------------------------------------------------|------------------------------------------------------------------|------------------|----------------------------------------|
| 1               | Hexosyl-hexose                                         | Sucrose <sup>B</sup>                                             | 99               | Sigma (S7903)                          |
| 2               | Hexose                                                 | Fructose <sup>A,B</sup>                                          | 99               | Sigma (47739)                          |
| 3               | Citric acid                                            | Citric acid <sup>A,B</sup>                                       | 99               | Sigma (251275)                         |
| 4               | Malic acid                                             | Malic acid <sup>A,B</sup>                                        | 99               | Sigma (W265501)                        |
| 5               | Tartaric acid                                          | Tartaric acid <sup>A,B</sup>                                     | 99               | Sigma (W304401)                        |
| 6               | Fumaric acid                                           | Fumaric acid <sup>A,B</sup>                                      | 99               | Sigma (47910)                          |
| 7               | Ascorbic acid                                          | Ascorbic acid <sup>A,B</sup>                                     | 99               | Sigma (255564)                         |
| 8               | Oxalic acid                                            | Oxalic acid <sup>A,B</sup>                                       | 99               | Sigma (658537)                         |
| 9               | 1- <i>O</i> -Galloyl glucose                           | 1- <i>O</i> -Galloyl glucose <sup>A,B</sup>                      | 90               | Sigma (69288)                          |
| 10              | Gallic acid                                            | Gallic acid <sup>A,B</sup>                                       | 97               | Sigma (C7384)                          |
| 11              | Pedunculagin                                           | Pedunculagin <sup>A,B</sup>                                      | 95               | Toronto (P354070)                      |
| 12              | Umbelliferone                                          | Umbelliferone <sup>A,B</sup>                                     | 99               | Sigma (H24003)                         |
| 13              | 4- <i>O</i> -Caffeoylquinic acid                       | 4- <i>O</i> -Caffeoylquinic acid <sup>A,B</sup>                  | 98               | Sigma (65969)                          |
| 14              | Strictinin                                             | Strictinin <sup>A,B</sup>                                        | 98               | Funakoshi (NH026102)                   |
| 15              | 5- <i>O</i> -Caffeoylquinic acid                       | 5- <i>O</i> -Caffeoylquinic acid <sup>A,B</sup>                  | 95               | Sigma (C3878)                          |
| 16              | Strictinin isomer                                      | Strictinin <sup>B</sup>                                          | 98               | Funakoshi (NH026102)                   |
| 17              | 3- <i>O</i> -Caffeoylquinic acid                       | 3- <i>O</i> -Caffeoylquinic acid <sup>A,B</sup>                  | 98               | Sigma (94419)                          |
| 18              | Pedunculagin isomer                                    | Pedunculagin <sup>B</sup>                                        | 95               | Toronto (P354070)                      |
| 19              | Procyanidin B2                                         | Procyanidin B2 <sup>A,B</sup>                                    | 90               | Sigma (PHL89552)                       |
| 20              | Cyanidin 3- <i>O</i> -sophoroside                      | Cyanidin 3- <i>O</i> -sophoroside <sup>A,B</sup>                 | 85               | Sigma (42739)                          |
| 21              | Procyanidin B4                                         | Procyanidin B4 <sup>A,B</sup>                                    | 98               | ChemFaces (CFN91171)                   |
| 22              | Pelargonidin di- <i>O</i> -hexoside                    | Pelargonidin 3- <i>O</i> -rutinoside <sup>B</sup>                | 98               | ChemFaces (CFN92133)                   |
| 23              | Catechin                                               | Catechin <sup>A,B</sup>                                          | 95               | Sigma (PHL89172)                       |
| 24              | <i>p</i> -Coumaric acid <i>O</i> -hexoside             | <i>p</i> -Coumaric acid<br>4- <i>O</i> -glucoside <sup>B</sup>   | 95               | Carbosynth (MC71595)                   |
| 25              | <i>p</i> -Coumaric acid 4- <i>O</i> -glucoside         | <i>p</i> -Coumaric acid<br>4- <i>O</i> -glucoside <sup>A,B</sup> | 95               | Carbosynth (MC71595)                   |
| 26              | Cyanidin 3- <i>O</i> -rutinoside                       | Cyanidin 3- <i>O</i> -rutinoside <sup>A,B</sup>                  | 90               | Sigma (PHL80577)                       |
| 27              | Cyanidin 3- <i>O</i> -glucoside                        | Cyanidin 3- <i>O</i> -glucoside <sup>A,B</sup>                   | 98               | Sigma (94099)                          |
| 28              | Pelargonidin 3- <i>O</i> -rutinoside                   | Pelargonidin 3- <i>O</i> -rutinoside <sup>A,B</sup>              | 98               | ChemFaces (CFN92133)                   |
| 29              | Pelargonidin 3- <i>O</i> -glucoside                    | Pelargonidin 3- <i>O</i> -glucoside <sup>A,B</sup>               | 98               | ChemFaces (CFN92134)                   |
| 30              | Castalagin isomer                                      | Castalagin <sup>B</sup>                                          | 95               | Sigma (61221)                          |
| 31              | Procyanidin C2                                         | Procyanidin C2 <sup>A,B</sup>                                    | 95               | TransMIT (C6201-P045)                  |
| 32              | Cyanidin <i>O-p</i> -coumaroyl- <i>O</i> -hexoside     | Cyanidin 3- <i>O</i> -glucoside <sup>B</sup>                     | 98               | Sigma (94099)                          |
| 33              | Casuarictin isomer                                     | Pedunculagin <sup>B</sup>                                        | 95               | Toronto (P354070)                      |
| 34              | Castalagin isomer                                      | Castalagin <sup>B</sup>                                          | 95               | Sigma (61221)                          |
| 35              | Sanguiin H2                                            | Sanguiin H2 <sup>A</sup><br>Pedunculagin <sup>B</sup>            | 92<br>95         | [68]<br>Toronto (P354070)              |
| 36              | Procyanidin trimer                                     | Procyanidin C2 <sup>B</sup>                                      | 95               | TransMIT (C6201-P045)                  |
| 37              | Pelargonidin <i>O-p</i> -coumaroyl- <i>O</i> -hexoside | Pelargonidin 3- <i>O</i> -glucoside <sup>B</sup>                 | 98               | ChemFaces (CFN92134)                   |
| 38              | Cyanidin <i>O</i> -acetyl- <i>O</i> -hexoside          | Cyanidin 3- <i>O</i> -glucoside <sup>B</sup>                     | 98               | Sigma (94099)                          |
| 39              | Quercetin 3- <i>O</i> -sophoroside                     | Quercetin 3- <i>O</i> -sophoroside <sup>A,B</sup>                | 98               | ChemFaces (CFN90630)                   |
| 40              | Casuarictin isomer                                     | Pedunculagin <sup>B</sup>                                        | 95               | Toronto (P354070)                      |
| 41              | Ellagic acid <i>O</i> -pentoside                       | Ellagic acid <sup>B</sup>                                        | 98               | ChemFaces (CFN98716)                   |
| 42              | Sanguiin H10                                           | Sanguiin H10 <sup>A</sup><br>Pedunculagin <sup>B</sup>           | 92<br>95         | [68]<br>Toronto (P354070)              |
| 43              | Ellagic acid <i>O</i> -desoxyhexoside                  | Ellagic acid <sup>B</sup>                                        | 98               | ChemFaces (CFN98716)                   |
| 44              | Sanguiin H2 isomer                                     | Sanguiin H2 <sup>A</sup><br>Pedunculagin <sup>B</sup>            | 92<br>95         | [68]<br>Toronto (P354070)              |
| 45              | Quercetin 3- <i>O</i> -rutinoside                      | Rutin                                                            | 95               | Sigma (R2303)                          |
| 46              | Sanguiin H6 isomer                                     | Sanguiin H6 <sup>A</sup><br>Pedunculagin <sup>B</sup>            | 92<br>95         | [68]<br>Toronto (P354070)              |

Table S1. Continuation

| No <sup>a</sup> | Compound                                                                   | Standard <sup>a</sup>                                                            | Purity, (≥)<br>% | Manufacturer<br>(Cat. no) <sup>b</sup> |
|-----------------|----------------------------------------------------------------------------|----------------------------------------------------------------------------------|------------------|----------------------------------------|
| 47              | Lambertianin C                                                             | Lambertianin C <sup>A</sup>                                                      | 92               | [68]                                   |
|                 |                                                                            | Pedunculagin <sup>B</sup>                                                        | 95               | Toronto (P354070)                      |
| 48              | Pelargonidin <i>O</i> -acetyl- <i>O</i> -hexoside                          | Pelargonidin 3- <i>O</i> -glucoside <sup>B</sup>                                 | 98               | ChemFaces (CFN92134)                   |
| 49              | Quercetin 3- <i>O</i> -glucoside                                           | Quercetin 3- <i>O</i> -glucoside <sup>A,B</sup>                                  | 98               | Sigma (16654)                          |
| 50              | Quercetin 3- <i>O</i> -glucuronide                                         | Quercetin 3- <i>O</i> -glucuronide <sup>A,B</sup>                                | 90               | Sigma (90733)                          |
| 51              | Agrimonic acid A                                                           | Agrimonic acid A <sup>A</sup>                                                    | 90               | [28]                                   |
|                 |                                                                            | Agrimoniin <sup>B</sup>                                                          | 95               | [28]                                   |
| 52              | Sanguin H6                                                                 | Sanguin H6 <sup>A</sup>                                                          | 92               | [68]                                   |
|                 |                                                                            | Pedunculagin <sup>B</sup>                                                        | 95               | Toronto (P354070)                      |
| 53              | Ellagic acid                                                               | Ellagic acid                                                                     | 98               | ChemFaces (CFN98716)                   |
| 54              | Agrimonic acid B                                                           | Agrimonic acid B <sup>A</sup>                                                    | 90               | [28]                                   |
|                 |                                                                            | Agrimoniin <sup>B</sup>                                                          | 95               | [28]                                   |
| 55              | Quercetin 3- <i>O</i> -xyloside                                            | Quercetin 3- <i>O</i> -xyloside <sup>A,B</sup>                                   | 97               | Sigma (83390)                          |
| 56              | Quercetin 3- <i>O</i> -arabinoside                                         | Quercetin 3- <i>O</i> -arabinoside <sup>A,B</sup>                                | 95               | Sigma (75759)                          |
| 57              | Kaempferol 3- <i>O</i> -rutinoside                                         | Kaempferol 3- <i>O</i> -rutinoside <sup>A,B</sup>                                | 98               | Sigma (90242)                          |
| 58              | Kaempferol 3- <i>O</i> -glucoside                                          | Kaempferol 3- <i>O</i> -glucoside <sup>A,B</sup>                                 | 97               | Sigma (79851)                          |
| 59              | Kaempferol 3- <i>O</i> -glucuronide                                        | Kaempferol 3- <i>O</i> -glucuronide <sup>A,B</sup>                               | 98               | ChemFaces (CFN90359)                   |
| 60              | Quercetin<br>3- <i>O</i> -(6''- <i>O</i> - <i>p</i> -coumaroyl)-glucoside  | Helichryoside <sup>A,B</sup>                                                     | 98               | BioCrick (BCN9477)                     |
| 61              | Quercetin <i>O</i> - <i>p</i> -coumaroyl- <i>O</i> -hexoside               | Helichryoside <sup>B</sup>                                                       | 98               | BioCrick (BCN9477)                     |
| 62              | Agrimoniin                                                                 | Agrimoniin <sup>A,B</sup>                                                        | 95               | [28]                                   |
| 63              | Fragariin A                                                                | Agrimoniin <sup>B</sup>                                                          | 95               | [28]                                   |
| 64              | Quercetin <i>O</i> -malonyl- <i>O</i> -hexoside                            | Quercetin<br>3- <i>O</i> -(6''- <i>O</i> -malonyl)-<br>glucoside <sup>B</sup>    | 85               | Sigma (16733)                          |
| 65              | Quercetin 3- <i>O</i> -(6''- <i>O</i> -malonyl)-glucoside                  | Quercetin<br>3- <i>O</i> -(6''- <i>O</i> -malonyl)-<br>glucoside <sup>A,B</sup>  | 85               | Sigma (16733)                          |
| 66              | Kaempferol<br>3- <i>O</i> -(6''- <i>O</i> - <i>p</i> -coumaroyl)-glucoside | Tiliroside <sup>A,B</sup>                                                        | 98               | Sigma (79257)                          |
| 67              | 1,2,3,4,6-Penta- <i>O</i> -galloylglucose                                  | 1,2,3,4,6-Penta- <i>O</i> -galloyl<br>glucose <sup>A,B</sup>                     | 96               | Sigma (67548)                          |
| 68              | Kaempferol <i>O</i> -malonyl- <i>O</i> -hexoside                           | Kaempferol<br>3- <i>O</i> -(6''- <i>O</i> -malonyl)-<br>glucoside <sup>B</sup>   | 95               | BOC (81149-02-2)                       |
| 69              | Kaempferol 3- <i>O</i> -(6''- <i>O</i> -malonyl)-glucoside                 | Kaempferol<br>3- <i>O</i> -(6''- <i>O</i> -malonyl)-<br>glucoside <sup>A,B</sup> | 95               | BOC (81149-02-2)                       |
| 70              | Quercetin 3- <i>O</i> -(2''- <i>O</i> -acetyl)-glucoside                   | Quercetin<br>3- <i>O</i> -(2''- <i>O</i> -acetyl)-glucoside <sup>A</sup>         | 92               | [70]                                   |
|                 |                                                                            | Quercetin<br>3- <i>O</i> -(6''- <i>O</i> -acetyl)-glucoside <sup>B</sup>         | 85               | Extrasynthese (1099)                   |
| 71              | Quercetin 3- <i>O</i> -(6''- <i>O</i> -acetyl)-glucoside                   | Quercetin<br>3- <i>O</i> -(6''- <i>O</i> -acetyl)-glucoside <sup>A,B</sup>       | 85               | Extrasynthese (1099)                   |
| 72              | Kaempferol <i>O</i> -acetyl- <i>O</i> -hexoside                            | Kaempferol 3- <i>O</i> -glucoside <sup>B</sup>                                   | 97               | Sigma (79851)                          |
| 73              | Kaempferol <i>O</i> -acetyl- <i>O</i> -hexoside                            | Kaempferol 3- <i>O</i> -glucoside <sup>B</sup>                                   | 97               | Sigma (79851)                          |
| 74              | Quercetin                                                                  | Quercetin <sup>A,B</sup>                                                         | 95               | Sigma (Q4951)                          |
| 75              | Tormentic acid di- <i>O</i> -hexoside                                      | Tormentic acid <sup>A,B</sup>                                                    | 98               | ChemFaces (CFN99434)                   |
| 76              | Kaempferol                                                                 | Kaempferol <sup>A,B</sup>                                                        | 99               | Sigma (96353)                          |
| 77              | Pomolic acid di- <i>O</i> -hexoside                                        | Pomolic acid <sup>B</sup>                                                        | 98               | ChemFaces (CFN99433)                   |
| 78              | Tormentic acid <i>O</i> -hexoside                                          | Tormentic acid <sup>B</sup>                                                      | 98               | ChemFaces (CFN99434)                   |
| 79              | Quercetin 3- <i>O</i> -(2'',6''-di- <i>O</i> -acetyl)-glucoside            | Quercetin<br>3- <i>O</i> -(2'',6''-di- <i>O</i> -acetyl)-<br>glucoside           | 90               | [70]                                   |
|                 |                                                                            | Quercetin<br>3- <i>O</i> -(6''- <i>O</i> -acetyl)-glucoside <sup>B</sup>         | 85               | Extrasynthese (1099)                   |

34

Table S1. Continuation

| No <sup>a</sup> | Compound                                                                                                | Standard <sup>a</sup>                                                          | Purity, (≥)<br>% | Manufacturer<br>(Cat. no) <sup>b</sup> |
|-----------------|---------------------------------------------------------------------------------------------------------|--------------------------------------------------------------------------------|------------------|----------------------------------------|
| 80              | Quercetin <i>O</i> -acetyl- <i>O</i> -malonyl- <i>O</i> -hexoside                                       | Quercetin<br>3- <i>O</i> -(6''- <i>O</i> -malonyl)-<br>glucoside <sup>B</sup>  | 85               | Sigma (16733)                          |
| 81              | Tormentic acid                                                                                          | Tormentic acid <sup>A,B</sup>                                                  | 98               | ChemFaces (CFN99434)                   |
| 82              | Ellagic acid <i>O</i> -methyl<br>ester- <i>O</i> -desoxyhexoside                                        | Ellagic acid <sup>A,B</sup>                                                    | 98               | ChemFaces (CFN98716)                   |
| 83              | Pomolic acid <i>O</i> -hexoside                                                                         | Pomolic acid <sup>A,B</sup>                                                    | 98               | ChemFaces (CFN99433)                   |
| 84              | Quercetin <i>O</i> -malonyl- <i>O</i> - <i>p</i> -coumaroyl-<br><i>O</i> -hexoside                      | Helichryoside <sup>B</sup>                                                     | 98               | BioCrick (BCN9477)                     |
| 85              | Quercetin <i>O</i> -malonyl- <i>O</i> - <i>p</i> -coumaroyl-<br><i>O</i> -hexoside                      | Helichryoside <sup>B</sup>                                                     | 98               | BioCrick (BCN9477)                     |
| 86              | Ellagic acid di- <i>O</i> -methyl ester-<br><i>O</i> -desoxyhexoside                                    | Ellagic acid <sup>A,B</sup>                                                    | 98               | ChemFaces (CFN98716)                   |
| 87              | Kaempferol di- <i>O</i> -acetyl- <i>O</i> -hexoside                                                     | Kaempferol 3- <i>O</i> -glucoside <sup>B</sup>                                 | 97               | Sigma (79851)                          |
| 88              | Quercetin<br><i>O</i> -acetyl- <i>O</i> - <i>p</i> -coumaroyl- <i>O</i> -hexoside                       | Helichryoside <sup>B</sup>                                                     | 98               | BioCrick (BCN9477)                     |
| 89              | Kaempferol<br><i>O</i> -acetyl- <i>O</i> -malonyl- <i>O</i> -hexoside                                   | Kaempferol<br>3- <i>O</i> -(6''- <i>O</i> -malonyl)-<br>glucoside <sup>B</sup> | 95               | BOC (81149-02-2)                       |
| 90              | Kaempferol <i>O</i> -malonyl- <i>O</i> - <i>p</i> -coumaroyl-<br><i>O</i> -hexoside                     | Tiliroside <sup>B</sup>                                                        | 98               | Sigma (79257)                          |
| 91              | Pomolic acid                                                                                            | Pomolic acid <sup>A,B</sup>                                                    | 98               | ChemFaces (CFN99433)                   |
| 92              | Kaempferol <i>O</i> -malonyl- <i>O</i> - <i>p</i> -coumaroyl-<br><i>O</i> -hexoside                     | Tiliroside <sup>B</sup>                                                        | 98               | Sigma (79257)                          |
| 93              | Kaempferol <i>O</i> -acetyl- <i>O</i> - <i>p</i> -coumaroyl-<br><i>O</i> -hexoside                      | Tiliroside <sup>B</sup>                                                        | 98               | Sigma (79257)                          |
| 94              | Quercetin di- <i>O</i> -acetyl- <i>O</i> - <i>p</i> -coumaroyl-<br><i>O</i> -hexoside                   | Helichryoside <sup>B</sup>                                                     | 98               | BioCrick (BCN9477)                     |
| 95              | Quercetin<br><i>O</i> -acetyl- <i>O</i> -malonyl- <i>O</i> - <i>p</i> -coumaroyl-<br><i>O</i> -hexoside | Helichryoside <sup>B</sup>                                                     | 98               | BioCrick (BCN9477)                     |

35 <sup>a</sup> Standards were used in qualitative (<sup>A</sup>) or/and quantitative analysis (<sup>B</sup>). <sup>b</sup> Manufacturers list:  
36 BioCrick—BioCrick (Chengdu, Sichuan, PRC); BOC—BOC Sciences (Shirley, NY, USA);  
37 Carbosynth—Carbosynth Ltd. (Compton, UK); ChemFaces—ChemFaces (Wuhan, Hubei, PRC);  
38 Extrasynthese—Extrasynthese (Lyon, France); Funakoshi—Funakoshi Co. Ltd. (Tokyo, Japan);  
39 Sigma—Sigma-Aldrich (St. Louis, MO, USA); Toronto—Toronto Research Chemicals (North York, ON,  
40 Canada); TransMIT—TransMIT GmbH (Gießen, Germany).

41

42 **Table S2.** Regression equations, correlation coefficients ( $r^2$ ), standard deviation ( $S_{yx}$ ), limits of  
 43 detection (LOD), limits of quantification (LOQ) and linear ranges for 48 reference standards.

| Compound                                                      | Ionization <sup>a</sup> | CE <sup>b</sup><br>(eV) | Regression equation <sup>c</sup> |                | $r^2$  | $S_{yx}$               | LOD/<br>LOQ<br>( $\mu\text{g/mL}$ ) | Linear<br>range<br>( $\mu\text{g/mL}$ ) |
|---------------------------------------------------------------|-------------------------|-------------------------|----------------------------------|----------------|--------|------------------------|-------------------------------------|-----------------------------------------|
|                                                               |                         |                         | $a$                              | $b \cdot 10^6$ |        |                        |                                     |                                         |
| 1,2,3,4,6-Penta- <i>O</i> -galloyl glucose                    | N                       | -25                     | 2.4561                           | -0.0171        | 0.9979 | 12.33·10 <sup>-2</sup> | 0.17/0.50                           | 0.6–100.0                               |
| 1- <i>O</i> -Galloyl glucose                                  | N                       | -20                     | 1.3586                           | -0.0663        | 0.9987 | 9.69·10 <sup>-2</sup>  | 0.24/0.71                           | 0.8–100.0                               |
| 3- <i>O</i> -Caffeoylquinic acid                              | N                       | -15                     | 0.9320                           | -0.0523        | 0.9991 | 4.14·10 <sup>-2</sup>  | 0.15/0.44                           | 0.5–100.0                               |
| 4- <i>O</i> -Caffeoylquinic acid                              | N                       | -15                     | 0.9217                           | -0.0437        | 0.9982 | 3.94·10 <sup>-2</sup>  | 0.14/0.43                           | 0.5–100.0                               |
| 5- <i>O</i> -Caffeoylquinic acid                              | N                       | -15                     | 0.9406                           | -0.0497        | 0.9973 | 5.18·10 <sup>-2</sup>  | 0.18/0.55                           | 0.6–100.0                               |
| Agrimoniin                                                    | N                       | -35                     | 0.8214                           | -0.2716        | 0.9893 | 5.37·10 <sup>-2</sup>  | 0.22/0.65                           | 0.7–100.0                               |
| Ascorbic acid                                                 | N                       | -10                     | 0.9214                           | -0.0373        | 0.9997 | 2.10·10 <sup>-2</sup>  | 0.07/0.22                           | 0.3–100.0                               |
| Castalagin                                                    | N                       | -35                     | 0.9361                           | -0.4518        | 0.9870 | 9.35·10 <sup>-2</sup>  | 0.32/1.00                           | 1.0–100.0                               |
| Catechin                                                      | N                       | -35                     | 0.9562                           | -0.0521        | 0.9971 | 7.79·10 <sup>-2</sup>  | 0.27/0.82                           | 0.9–100.0                               |
| Citric acid                                                   | N                       | -10                     | 0.9518                           | -0.0267        | 0.9990 | 1.03·10 <sup>-2</sup>  | 0.03/0.10                           | 0.1–100.0                               |
| Cyanidin 3- <i>O</i> -glucoside                               | N                       | -20                     | 1.4267                           | -0.5637        | 0.9907 | 12.72·10 <sup>-2</sup> | 0.29/0.89                           | 0.9–100.0                               |
| Cyanidin 3- <i>O</i> -rutinoside                              | N                       | -20                     | 1.6341                           | -0.4283        | 0.9900 | 15.02·10 <sup>-2</sup> | 0.30/0.92                           | 1.0–100.0                               |
| Cyanidin 3- <i>O</i> -sophoroside                             | N                       | -20                     | 1.5963                           | -0.3518        | 0.9910 | 14.63·10 <sup>-2</sup> | 0.30/0.92                           | 1.0–100.0                               |
| Ellagic acid                                                  | N                       | -30                     | 0.9114                           | -0.6312        | 0.9887 | 6.37·10 <sup>-2</sup>  | 0.23/0.70                           | 0.7–100.0                               |
| Fructose                                                      | N                       | -10                     | 1.5632                           | -0.0376        | 0.9983 | 5.14·10 <sup>-2</sup>  | 0.11/0.33                           | 0.4–100.0                               |
| Fumaric acid                                                  | N                       | -10                     | 0.8615                           | -0.0364        | 0.9982 | 2.03·10 <sup>-2</sup>  | 0.03/0.07                           | 0.1–100.0                               |
| Gallic acid                                                   | N                       | -20                     | 2.6538                           | -0.1376        | 0.9990 | 1.17·10 <sup>-2</sup>  | 0.01/0.04                           | 0.1–100.0                               |
| Helichryoside                                                 | N                       | -30                     | 2.0319                           | -0.3615        | 0.9811 | 10.09·10 <sup>-2</sup> | 0.17/0.52                           | 0.6–100.0                               |
| Kaempferol<br>3- <i>O</i> -(6''- <i>O</i> -malonyl)-glucoside | N                       | -30                     | 2.3618                           | -0.5214        | 0.9873 | 11.35·10 <sup>-2</sup> | 0.16/0.48                           | 0.5–100.0                               |
| Kaempferol 3- <i>O</i> -glucoside                             | N                       | -20                     | 2.0859                           | -0.9171        | 0.9980 | 6.18·10 <sup>-2</sup>  | 0.03/0.09                           | 0.1–100.0                               |
| Kaempferol 3- <i>O</i> -glucuronide                           | N                       | -30                     | 2.2126                           | -0.5160        | 0.9987 | 8.11·10 <sup>-2</sup>  | 0.12/0.37                           | 0.4–100.0                               |
| Kaempferol 3- <i>O</i> -rutinoside                            | N                       | -30                     | 1.9634                           | -0.4511        | 0.9952 | 9.18·10 <sup>-2</sup>  | 0.15/0.46                           | 0.5–100.0                               |
| Kaempferol                                                    | N                       | -20                     | 1.2416                           | -0.3615        | 0.9901 | 3.02·10 <sup>-2</sup>  | 0.08/0.24                           | 0.3–100.0                               |
| Malic acid                                                    | N                       | -10                     | 0.9911                           | -0.0379        | 0.9988 | 2.05·10 <sup>-2</sup>  | 0.07/0.21                           | 0.3–100.0                               |
| Oxalic acid                                                   | N                       | -10                     | 0.9804                           | -0.0210        | 0.9970 | 2.01·10 <sup>-2</sup>  | 0.06/0.21                           | 0.3–100.0                               |
| <i>p</i> -Coumaric acid 4- <i>O</i> -glucoside                | N                       | -20                     | 1.4238                           | -0.0891        | 0.9901 | 7.33·10 <sup>-2</sup>  | 0.17/0.52                           | 0.6–100.0                               |
| Pedunculagin                                                  | N                       | -35                     | 0.6370                           | -0.4521        | 0.9872 | 6.11·10 <sup>-2</sup>  | 0.32/0.96                           | 1.0–100.0                               |
| Pelargonidin 3- <i>O</i> -glucoside                           | N                       | -20                     | 0.9634                           | -0.8634        | 0.9832 | 10.37·10 <sup>-2</sup> | 0.36/1.07                           | 1.1–100.0                               |
| Pelargonidin 3- <i>O</i> -rutinoside                          | N                       | -20                     | 0.8237                           | -0.7310        | 0.9801 | 14.73·10 <sup>-2</sup> | 0.59/1.79                           | 2.0–100.0                               |
| Pomolic acid                                                  | N                       | -30                     | 1.4784                           | -0.8634        | 0.9763 | 19.39·10 <sup>-2</sup> | 0.43/1.31                           | 1.5–100.0                               |
| Procyanidin B2                                                | N                       | -25                     | 1.3620                           | -0.0820        | 0.9961 | 9.91·10 <sup>-2</sup>  | 0.21/0.72                           | 0.8–100.0                               |
| Procyanidin B4                                                | N                       | -25                     | 1.0634                           | -0.0933        | 0.9902 | 10.01·10 <sup>-2</sup> | 0.31/0.94                           | 1.0–100.0                               |
| Procyanidin C2                                                | N                       | -25                     | 1.4632                           | -0.0524        | 0.9953 | 8.12·10 <sup>-2</sup>  | 0.18/0.56                           | 0.6–100.0                               |
| Quercetin<br>3- <i>O</i> -(6''- <i>O</i> -acetyl)-glucoside   | N                       | -20                     | 1.1103                           | -0.9217        | 0.9901 | 14.33·10 <sup>-2</sup> | 0.42/1.29                           | 1.5–100.0                               |
| Quercetin<br>3- <i>O</i> -(6''- <i>O</i> -malonyl)-glucoside  | N                       | -20                     | 1.2703                           | -0.7911        | 0.9814 | 15.26·10 <sup>-2</sup> | 0.40/1.20                           | 1.5–100.0                               |
| Quercetin 3- <i>O</i> -arabinoside                            | N                       | -20                     | 1.4412                           | -0.6211        | 0.9930 | 11.25·10 <sup>-2</sup> | 0.26/0.78                           | 0.8–100.0                               |
| Quercetin 3- <i>O</i> -glucoside                              | N                       | -20                     | 1.8267                           | -0.4160        | 0.9990 | 11.73·10 <sup>-2</sup> | 0.21/0.67                           | 0.7–100.0                               |
| Quercetin 3- <i>O</i> -glucuronide                            | N                       | -20                     | 1.6705                           | -0.4374        | 0.9988 | 12.79·10 <sup>-2</sup> | 0.25/0.77                           | 0.8–100.0                               |
| Quercetin 3- <i>O</i> -sophoroside                            | N                       | -25                     | 1.4001                           | -0.8214        | 0.9884 | 12.08·10 <sup>-2</sup> | 0.29/0.86                           | 1.0–100.0                               |
| Quercetin 3- <i>O</i> -xyloside                               | N                       | -20                     | 1.5364                           | -0.3614        | 0.9927 | 10.07·10 <sup>-2</sup> | 0.22/0.66                           | 0.7–100.0                               |
| Quercetin                                                     | N                       | -15                     | 1.1105                           | -0.3211        | 0.9937 | 4.18·10 <sup>-2</sup>  | 0.12/0.38                           | 0.4–100.0                               |
| Rutin                                                         | N                       | -25                     | 1.2716                           | -0.7389        | 0.9897 | 9.14·10 <sup>-2</sup>  | 0.23/0.72                           | 0.8–100.0                               |
| Strictinin                                                    | N                       | -35                     | 0.9634                           | -0.3518        | 0.9804 | 7.34·10 <sup>-2</sup>  | 0.25/0.76                           | 0.8–100.0                               |
| Sucrose                                                       | N                       | -10                     | 1.6278                           | -0.0428        | 0.9990 | 7.11·10 <sup>-2</sup>  | 0.14/0.44                           | 0.5–100.0                               |

44

Table S2. Continuation

| Compound       | Ionization <sup>a</sup> | CE <sup>b</sup><br>(eV) | Regression equation <sup>c</sup> |                | $r^2$  | $S_{yx}$              | LOD/<br>LOQ<br>( $\mu\text{g/mL}$ ) | Linear<br>range<br>( $\mu\text{g/mL}$ ) |
|----------------|-------------------------|-------------------------|----------------------------------|----------------|--------|-----------------------|-------------------------------------|-----------------------------------------|
|                |                         |                         | $a$                              | $b \cdot 10^6$ |        |                       |                                     |                                         |
| Tartaric acid  | N                       | -10                     | 1.5330                           | -0.0863        | 0.9985 | $4.15 \cdot 10^{-2}$  | 0.09/0.27                           | 0.3–100.0                               |
| Tiliroside     | N                       | -30                     | 2.3312                           | -0.4563        | 0.9803 | $14.92 \cdot 10^{-2}$ | 0.21/0.64                           | 0.7–100.0                               |
| Tormentic acid | N                       | -30                     | 1.2820                           | -0.9634        | 0.9697 | $11.64 \cdot 10^{-2}$ | 0.30/0.91                           | 1.0–100.0                               |
| Umbelliferone  | N                       | -15                     | 0.5697                           | -0.2634        | 0.9900 | $4.33 \cdot 10^{-2}$  | 0.25/0.76                           | 0.8–100.0                               |

45 <sup>a</sup> Ionization mode : N—negative. <sup>b</sup> CE—collision energy. <sup>c</sup> Regression equation:  $y = a \cdot x + b$ .

46

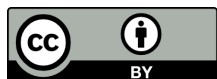

© 2020 by the authors. Submitted for possible open access publication under the terms and conditions of the Creative Commons Attribution (CC BY) license (<http://creativecommons.org/licenses/by/4.0/>).

47
